# Supplementary material for: Rapid and sensitive detection of Chlamydia trachomatis sexually transmitted infections in resource-constrained settings in Thailand at the point-of-care
Source: PubMed Central journal article supplement (PMC6301561; doi:10.1371/journal.pntd.0006900), 2018-12-20

Prototypical STARD diagram to report flow of participants through the study

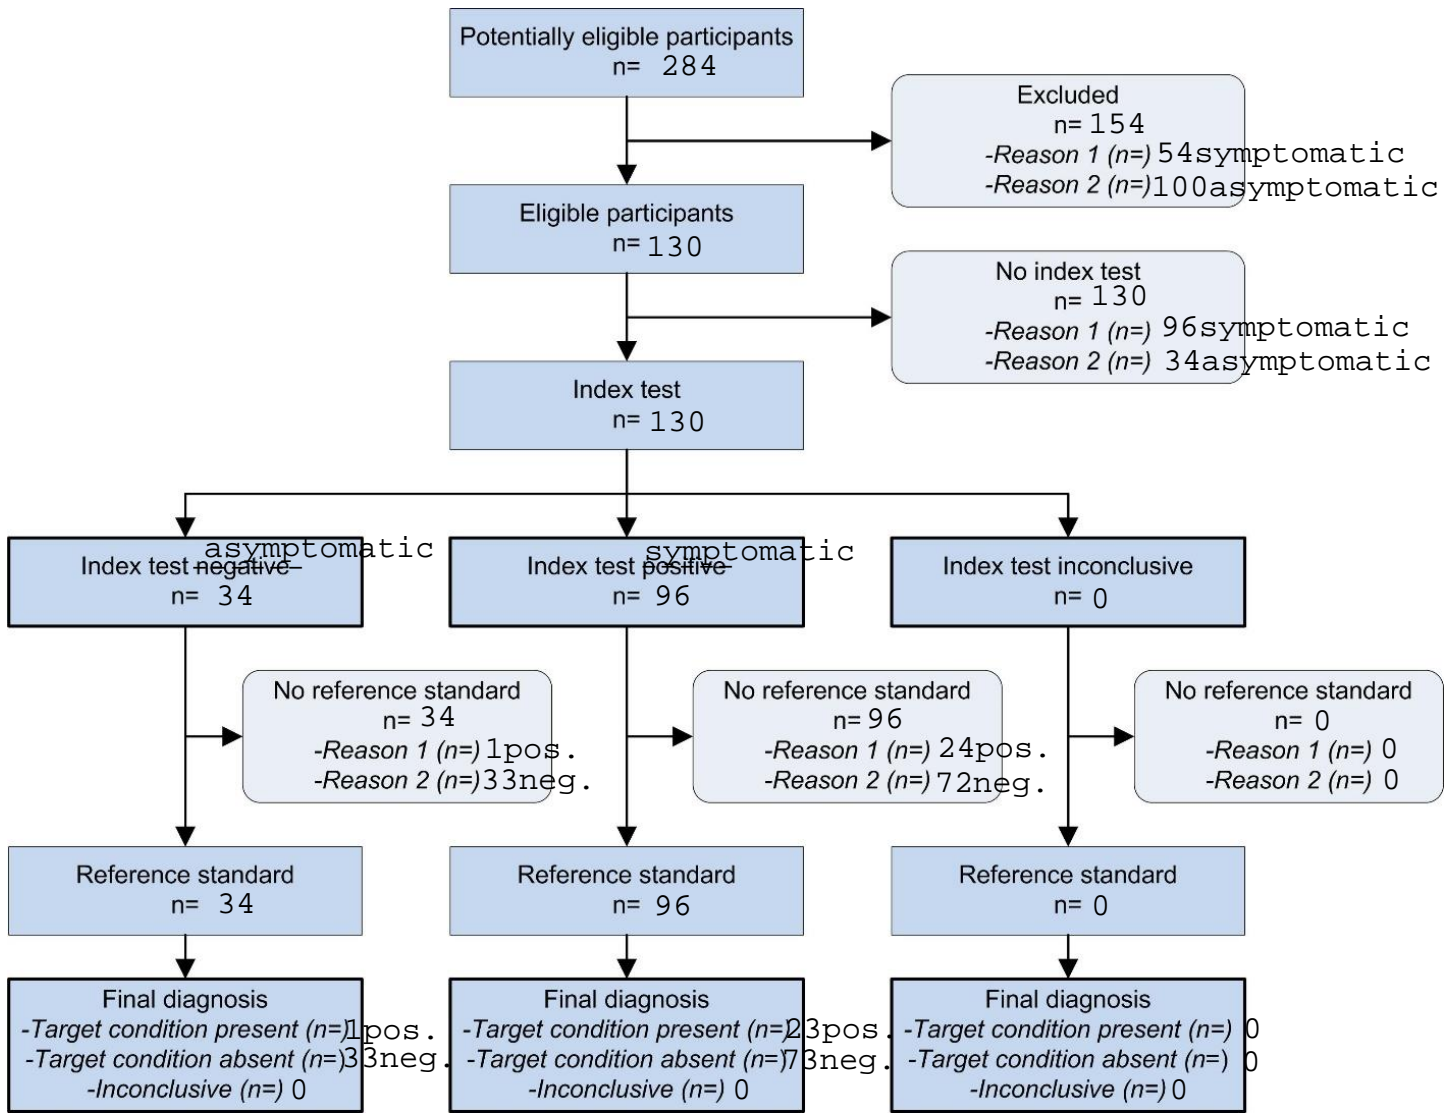

Supplement: pntd.0006900.s002.pdf [file pntd.0006900.s002.pdf]
